# Supplementary material
Source: ML conference proceedings conference paper supplement (https://proceedings.mlr.press/v51/camoriano16.html)
Supplement: Supplementary file 1 [file camoriano16-supp.pdf]

## A Some useful results

**Proposition 1** (Spectral functions). *Let  $f, g : [0, T] \rightarrow \mathbb{R}$  be continuous functions and  $A \in \mathbb{R}^{n \times n}$  symmetric with  $\|A\| \leq T$ , for  $T > 0$ ,  $n \geq 1$ . Let  $A = U\Sigma U^\top$  be its eigenvalue decomposition with  $U \in \mathbb{R}^{n \times n}$  an orthonormal matrix,  $U^\top U = UU^\top = I$  and  $\Sigma$  a diagonal matrix, then*

$$\begin{aligned} f(A) &= Uf(\Sigma)U^\top, \\ f(A) + g(A) &= (f + g)(A), \quad f(A)g(A) = (fg)(A) \end{aligned}$$

where  $f(\Sigma) = \text{diag}(f(\sigma_1), \dots, f(\sigma_n))$ . Moreover, let  $B \in \mathbb{R}^{n \times m}$  with  $n, m \geq 1$ , then

$$f(B^\top B)B^\top = B^\top f(BB^\top).$$

**Proposition 2.** *With the notation of Section 2.3 let  $R \in \mathbb{R}^{m \times p}$  such that  $K_{mm}^\dagger = RR^\top$  and  $A = K_{nm}R$ . Then, for any  $\lambda, m > 0$ ,  $\tilde{\alpha}_{m,\lambda}$  is characterized by Equation 18.*

*Proof.* By Equation 7.7 of Rifkin et al. we have that

$$\begin{aligned} \tilde{\alpha}_{m,\lambda} &= K_{mm}^\dagger K_{nm}^\top (K_{nm}K_{mm}^\dagger K_{nm}^\top + \lambda n I)^{-1} y \\ &= RR^\top K_{nm}^\top (K_{nm}RR^\top K_{nm}^\top + \lambda n I)^{-1} y \\ &= RA^\top (AA^\top + \lambda n I)^{-1} y \\ &= R(A^\top A + \lambda n I)^{-1} A^\top y, \end{aligned}$$

where the last step is due to Prop. 1.  $\square$

**Proposition 3.** *Let  $k : \mathcal{X} \times \mathcal{X} \rightarrow \mathbb{R}$  be a kernel function on  $\mathcal{X}$ ,  $x_1, \dots, x_n$  be the given points and  $y = (y_1, \dots, y_n)$  be the labels of the dataset. For any function of the form  $f(x) = \sum_{i=1}^n w_i k(x, x_i)$  with  $w = Cy$  for any  $x \in \mathcal{X}$ , with  $C \in \mathbb{R}^{n \times n}$  independent from  $y$ , the following holds*

$$\mathbb{E}_y R(f) = \underbrace{\frac{\sigma^2}{n} \text{Tr}(Q^2)}_{\text{Variance } V(Q)} + \underbrace{\frac{1}{n} \|P(I - Q)\mu\|^2}_{\text{Bias } B(Q)},$$

with  $Q = KC \in \mathbb{R}^{n \times n}$ ,  $K$  the kernel matrix,  $\mu = \mathbb{E}y \in \mathbb{R}^n$  and  $P = K^\dagger K$  the projection operator on the range of  $K$ .

*Proof.* A function  $f \in \mathcal{H}$  is of the form  $f(x) = \sum_{i=1}^n \alpha_i k(x, x_i)$  for any  $x \in \mathcal{X}$ . If we compute it on a point of the dataset  $x_i$ , with  $i \in \{1, \dots, n\}$  we have  $f(x_i) = \sum_{j=1}^n \alpha_j k(x_i, x_j) = k_i^\top w$  with  $w = Cy$  and  $k_i = (k(x_i, x_1), \dots, k(x_i, x_n))$ . Note that  $K = (k_1, \dots, k_n)$ .

**Rewriting of E, R for fixed design.** We have

$$\begin{aligned} \mathcal{E}(w) &= \frac{1}{n} \sum_{i=1}^n \mathbb{E}(k_i^\top w - y_i) = \frac{1}{n} \sum_{i=1}^n (\mathbb{E}(k_i^\top w - \mu_i)^2 \\ &\quad - 2(k_i^\top w - \mu_i)(y_i - \mu_i) + (y_i - \mu_i)^2) \\ &= \frac{1}{n} \sum_{i=1}^n (k_i^\top w - \mu_i)^2 + \frac{\sigma^2}{n} = \frac{\sigma^2}{n} + \frac{1}{n} \|Kw - \mu\|^2, \end{aligned}$$

Now note that  $PK = K$  and  $(I - P)K = 0$ , that  $\|q\|^2 = \|Pq\|^2 + \|(I - P)q\|^2$  for any  $q \in \mathcal{H}$  and that  $\inf_{v \in \mathcal{X}} \mathcal{E}(v) = \sigma^2 + \|(I - P)\mu\|^2$ , then the excess risk can be rewritten as

$$\begin{aligned} R(w) &= \frac{1}{n} \|Kw - \mu\|^2 - \frac{1}{n} \|(I - P)\mu\|^2 \\ &= \frac{1}{n} \|P(Kw - \mu)\|^2 + \frac{1}{n} \|(I - P)(Kw - \mu)\|^2 \\ &\quad - \frac{1}{n} \|(I - P)\mu\|^2 = \frac{1}{n} \|P(Kw - \mu)\|^2. \end{aligned}$$

**Expected Excess Risk.** Now we focus on the expectation of  $R$  with respect to the dataset for linear functions that depend linearly on the observed labels  $y$ . Indeed we have

$$\begin{aligned} \mathbb{E}R(w) &= \frac{1}{n} \mathbb{E} \|P(KCy - P\mu)\|^2 \\ &= \frac{1}{n} \mathbb{E} \|PQ(y - \mu) + P(I - Q)\mu\|^2 \\ &= \frac{1}{n} \mathbb{E} \text{Tr}(Q(y - \mu)(y - \mu)^\top Q) + \frac{1}{n} \|P(I - Q)\mu\|^2 \\ &\quad - \frac{2}{n} \mathbb{E}(y - \mu)^\top QP(I - Q)\mu \\ &= \frac{1}{n} \text{Tr}(Q\mathbb{E}(y - \mu)(y - \mu)^\top Q) + \frac{1}{n} \|P(I - Q)\mu\|^2 \\ &= \frac{\sigma^2}{n} \text{Tr}(Q^2) + \frac{1}{n} \|P(I - Q)\mu\|^2. \end{aligned}$$

Here the third step is due to  $\|a - b\|^2 = \|a\|^2 + \|b\|^2 - 2a^\top b$  and that  $\|a\|^2 = \text{Tr}(aa^\top)$ , for any vector  $a, b$ . The last term in the third step vanishes due to the fact that  $y - \mu$  is a zero mean random variable. Moreover, note that  $(\mathbb{E}(y - \mu)(y - \mu)^\top)_{ij} = \mathbb{E}(y_i - \mu_i)(y_j - \mu_j) = \sigma^2 \delta_{ij}$ , therefore  $\mathbb{E}(y - \mu)(y - \mu)^\top = \sigma^2 I$ .  $\square$

## B Proofs

*Proof of Theorem 1.* By applying Prop. 3 to the estimator of Equation 3 we have  $Q_{\text{ols}} = K^\dagger K = P$ . Now note that  $P^2 = P$  by definition,  $\text{Tr}(P) = d^*$  and that  $P(I - P) = 0$ , therefore

$$\mathbb{E}R(f_{\text{ols}}) = \frac{\sigma^2}{n} \text{Tr}(P^2) + \frac{1}{n} \|P(I - P)\mu\| = \frac{\sigma^2 d^*}{n}.$$

$\square$

*Proof of Theorem 2.* Let  $K = U\Sigma U^\top$  be the eigen-decomposition of  $K$  with  $U$  an orthonormal matrix and  $\Sigma$  a diagonal matrix with  $\sigma_1 \geq \dots \geq \sigma_n \geq 0$ . Let  $\bar{Q}_\lambda = (K + \lambda nI)^{-1}K$ ,  $\beta = U^\top P\mu$  with  $\mu = \mathbb{E}y$  as in Eq. (5),  $P = K^\dagger K$  the projection operator on the range of  $K$ . By applying Prop. 3 to the estimator of Eq. (3), considering that  $P(I - \bar{Q}_\lambda) = (I - \bar{Q}_\lambda)P$ , that  $I - \bar{Q}_\lambda = \lambda n(K + \lambda nI)^{-1}$  and that  $\sigma_i = \beta_i = 0$  for  $i > d^*$ , we have

$$\begin{aligned} \mathbb{E}R(\bar{f}_\lambda) &= \frac{\sigma^2}{n} \text{Tr}(\bar{Q}_\lambda^2) + \frac{1}{n} \|P(I - \bar{Q}_\lambda)\mu\|^2 \\ &= \frac{\sigma^2}{n} \text{Tr}(\bar{Q}_\lambda^2) + \frac{1}{n} \|(I - \bar{Q}_\lambda)P\mu\|^2 \\ &= \frac{\sigma^2}{n} \text{Tr}(\Sigma^2(\Sigma + \lambda I)^{-2}) + \frac{\lambda}{n} \|(\Sigma + \lambda I)^{-1}\beta\|^2 \\ &= \frac{1}{n} \sum_{i=1}^{d^*} \frac{\sigma^2 \bar{\sigma}_i^2 + \lambda^2 n^2 \beta_i^2}{(\sigma_i + \lambda n)^2} = \frac{1}{n} \sum_{i=1}^{d^*} \frac{\sigma^2 \bar{\sigma}_i^2 + \lambda^2 \beta_i^2}{(\bar{\sigma}_i + \lambda)^2}, \end{aligned}$$

with  $\bar{\sigma}_i = \sigma_i/n$  for  $1 \leq i \leq d^*$ . Note that, by defining  $\tau_i = \sigma_i^{-1/2} \beta_i$  for  $1 \leq i \leq d^*$ , we have

$$\begin{aligned} \|f_{\text{opt}}\|_{\mathcal{H}}^2 &= \sum_{i,j=1}^n \langle \alpha_{\text{opt},i} k(x_i, \cdot), \alpha_{\text{opt},j} k(x_j, \cdot) \rangle_{\mathcal{H}} \\ &= \alpha_{\text{opt}}^\top K \alpha_{\text{opt}} = \mu^\top K^\dagger K K^\dagger \mu = \mu^\top P K^\dagger P \mu \\ &= \mu^\top P U \Sigma^\dagger U^\top P \mu = \beta^\top \Sigma^\dagger \beta = \sum_{i=1}^{d^*} \tau_i^2. \end{aligned}$$

Now we study  $\mathbb{E}R(\bar{f}_{\lambda^*})$ . When  $\lambda^* = \sigma^2/T$  with  $T = \|f_{\text{opt}}\|_{\mathcal{H}}^2$ . We have

$$\begin{aligned} \mathbb{E}R(\bar{f}_{\lambda^*}) &= \frac{\sigma^2}{n} \sum_{i=1}^{d^*} \frac{\bar{\sigma}_i}{\bar{\sigma}_i + \lambda^*} \frac{\bar{\sigma}_i + \sigma^2 \frac{\tau_i^2}{T}}{\bar{\sigma}_i + \frac{\sigma^2}{T}} \\ &= \frac{\sigma^2}{n} \sum_{i=1}^{d^*} \frac{\bar{\sigma}_i}{\bar{\sigma}_i + \lambda^*} \frac{(\bar{\sigma}_i + \frac{\sigma^2}{T}) - \frac{\sigma^2}{T} (1 - \frac{\tau_i^2}{T})}{\bar{\sigma}_i + \frac{\sigma^2}{T}} \\ &= \frac{\sigma^2}{n} \sum_{i=1}^{d^*} \frac{\bar{\sigma}_i}{\bar{\sigma}_i + \lambda^*} \left( 1 - \frac{1 - \tau_i^2/T}{1 + T\bar{\sigma}_i/\sigma^2} \right) \\ &\leq \frac{\sigma^2}{n} \sum_{i=1}^{d^*} \frac{\bar{\sigma}_i}{\bar{\sigma}_i + \lambda^*} = \frac{\sigma^2}{n} \sum_{i=1}^{d^*} \frac{\sigma_i}{\sigma_i + \lambda^* n} \\ &= \frac{\sigma^2}{n} \text{Tr}(\Sigma(\Sigma + \lambda^* nI)^{-1}) = \frac{\sigma^2}{n} d_{\text{eff}}(\lambda^*). \end{aligned}$$

□

*Proof of Theorem 3.* It is an application of Theorem 5 when we select the whole training set ( $m = n$ ) for the Nyström approximation. In that case the expected excess risks of Nyström KRLS and NYTRO are just equal to the ones of KRLS and Early Stopping, indeed when  $m = n$  we have that  $K_{mm} = K_{nm} = K$ . If we

call  $\bar{Q}_\lambda$  and  $\tilde{Q}_{n,\lambda}$  the  $Q$ -matrices for the two algorithms (see Prop. 3) and  $R$  such that  $RR^\top = K_{mm}^\dagger$ , for any  $\lambda > 0$  we have

$$\begin{aligned} \bar{Q}_\lambda &= (K + \lambda nI)^{-1}K = (KK^\dagger K + \lambda nI)^{-1}KK^\dagger K \\ &= (KRR^\top K + \lambda nI)^{-1}KRR^\top K \\ &= KR(R^\top K^2 R + \lambda nI)^{-1}R^\top K = \tilde{Q}_{n,\lambda}. \end{aligned}$$

□

*Proof of Theorem 5.* In the following we assume without loss of generality that the selected points  $\tilde{x}_1, \dots, \tilde{x}_m$  are the first  $m$  points in the dataset. In Prop. 3 we have seen that the behavior of an algorithm in a fixed design setting is completely described by a matrix  $Q = KC$  when the coefficients of the estimator of the algorithm are of the form  $Cy$ . Now we find the associated  $Q$  for NYTRO, that is  $\hat{Q}_{m,\gamma,t}$ . By solving the recursion of Equation (19), we have for any  $i \in \{1, \dots, n\}$

$$\begin{aligned} \hat{f}_{m,\gamma,t}(x_i) &= k_i^\top Cy, \text{ with } C = \begin{pmatrix} C_{m,\gamma,t} \\ 0_{(n-m) \times n} \end{pmatrix}, \\ C_{m,\gamma,t} &= \gamma \sum_{p=0}^{t-1} R(I - \gamma A^\top A)^p A^\top, \end{aligned}$$

with  $A = K_{nm}R$  and  $k_i = (k(x_i, x_1), \dots, k(x_i, x_n))$ . Therefore, we have

$$\begin{aligned} \hat{Q}_{m,\gamma,t} &= KC = \gamma \sum_{p=0}^{t-1} K_{nm}R(I - \gamma A^\top A)^p A^\top \\ &= \gamma \sum_{p=0}^{t-1} A(I - \gamma A^\top A)^p A^\top. \end{aligned}$$

**Rewriting of  $\hat{Q}_{m,\gamma,t}$ .** Now we rewrite  $\hat{Q}_{m,\gamma,t}$  in a suitable form to bound the bias and variance error. First of all we apply Prop. 1 to  $\hat{Q}_{m,\gamma,t}$ . Let  $f(\sigma) = \gamma \sum_{i=0}^{t-1} (1 - \gamma/n\sigma)^p$  with  $\sigma \in [0, n/\gamma]$ , we have that

$$\hat{Q}_{m,\gamma,t} = Af(A^\top A)A^\top = f(AA^\top)AA^\top = g(AA^\top),$$

where  $g(\sigma) = f(\sigma)\sigma$ . Now note that

$$g(\sigma) = \gamma\sigma \sum_{i=0}^{t-1} (1 - \gamma/n\sigma)^p = 1 - (1 - \gamma/n\sigma)^t,$$

therefore we have

$$\hat{Q}_{m,\gamma,t} = g(AA^\top) = I - (I - \gamma/nAA^\top)^t.$$

**Bound of the bias.** Now we are going to bound the

bias for NYTRO. Let  $\lambda = 1/(\gamma t)$  and  $Z = AA^\top$ , then

$$\begin{aligned} B(\hat{Q}_{m,\gamma,t}) &= \frac{1}{n} \|P(I - \hat{Q}_{m,\gamma,t})\mu\|^2 \\ &= \frac{1}{n} \|P(I - \frac{\gamma}{n}Z)^t \mu\|^2 = \frac{1}{n} \|(I - \frac{\gamma}{n}Z)^t P\mu\|^2 \\ &= \frac{1}{n} \|(I - \frac{\gamma}{n}Z)^t (Z + \lambda n I)(Z + \lambda n I)^{-1} P\mu\|^2 \\ &\leq \frac{1}{n} q(A, \lambda n) \|(Z + \lambda n I)^{-1} P\mu\|^2 \end{aligned}$$

and  $q(A, \lambda n) = \|(I - \gamma/n AA^\top)^t (AA^\top + \lambda n I)\|^2$ . Note that the third step is due to the fact that  $\text{ran } Z \subseteq \text{ran } K = \text{ran } P$  and  $Z$  is symmetric, therefore  $Ph(Z) = h(Z)P$  as a consequence of Prop. 1 for any spectral function  $h$ . Let  $\sigma_1, \dots, \sigma_n$  be the singular values of  $Z$ , we have

$$\begin{aligned} q\left(A, \frac{n}{\gamma t}\right) &= \sup_{i \in \{1, \dots, n\}} (1 - \gamma/n \sigma_i)^{2t} \left(\sigma_i + \frac{n}{\gamma t}\right)^2 \\ &\leq \sup_{0 \leq \sigma \leq n/\gamma} (1 - \gamma/n \sigma)^{2t} \left(\sigma + \frac{n}{\gamma t}\right)^2 \leq \frac{n^2}{\gamma^2 t^2}. \end{aligned}$$

Therefore we have

$$B(\hat{Q}_{m,\gamma,t}) \leq \lambda^2 n \|(Z + \lambda n I)^{-1} P\mu\|^2.$$

**Bound for the Variance.** Let  $t \geq 2$ ,  $\lambda = \frac{1}{\gamma t}$ ,  $r(\sigma) = (1 - \gamma/n \sigma)^t$  and

$$v(\sigma) = \sigma/(t-1) + \sigma(1+r(\sigma)) - \lambda n(1-r(\sigma)).$$

We have  $v(\sigma) \geq 0$  for  $0 \leq \sigma \leq n/\gamma$ . Indeed for  $\lambda n < \sigma \leq n/\gamma$  we have  $v(\sigma) \geq 0$  since  $0 \leq r(\sigma) \leq 1$ , while for  $0 \leq \sigma \leq \lambda n$  we have

$$\begin{aligned} \lambda n(1-r(\sigma)) &= \lambda n \left(1 - e^{-t \log \frac{1-\frac{1}{n}\sigma}{1-\frac{\gamma\sigma}{n}}}\right) \leq \frac{n}{\gamma t} t \log \frac{1}{1-\frac{\gamma\sigma}{n}} \\ &\leq \frac{n}{\gamma} \frac{\gamma/n \sigma}{1-\gamma/n \sigma} \leq \frac{\sigma}{1-\frac{1}{t}} = \frac{\sigma}{t-1} + \sigma \\ &\leq \frac{\sigma}{t-1} + \sigma(1+r(\sigma)), \end{aligned}$$

therefore  $v(\sigma) \geq 0$ . Now let  $0 \leq \sigma \leq n/\gamma$ . Since  $v(\sigma) \geq 0$ , the function  $w(\sigma) = v(\sigma)/(\sigma + \lambda n)$  is  $w(\sigma) \geq 0$ . Now we rewrite  $w$  a bit. First of all, note that

$$w(\sigma) = (2t-1)/(t-1)w_1(\sigma) - g(\sigma),$$

with  $w_1(\sigma) = \sigma/(\sigma + \lambda n)$ . The fact that  $w(\sigma) \geq 0$  and that  $g(\sigma) \geq 0$  implies that

$$\left(\frac{2t-1}{t-1}\right)^2 w_1(\sigma)^2 \geq g(\sigma)^2. \quad \forall 0 \leq \sigma \leq \frac{n}{\gamma}, t \geq 2$$

Now we focus on  $\text{Tr}(\hat{Q}_{\gamma t}^2)$ . Let  $Z = U\Sigma U^\top$  be its eigenvalue decomposition with  $U$  an orthonormal matrix and  $\Sigma = \text{diag}(\sigma_1, \dots, \sigma_n)$  with  $\sigma_1 \geq \dots \geq \sigma_n \geq 0$ ,

$$\begin{aligned} \text{Tr}(\hat{Q}_{m,\gamma,t}^2) &= \text{Tr}(g^2(Z)) = \text{Tr}(Ug^2(\Sigma)U^\top) = \text{Tr}(g^2(\Sigma)) \\ &= \sum_{i=1}^n g(\sigma_i)^2 \leq c_t \sum_{i=1}^n w_1(\sigma_i)^2 = c_t \text{Tr}(w_1(\Sigma)^2) \\ &= c_t \text{Tr}(Uw_1(\Sigma)^2 U^\top) = c_t \text{Tr}(w_1(Z)^2) \\ &= c_t \text{Tr}(Z^2(Z + \lambda n I)^{-2}) \end{aligned}$$

where we applied many times Prop. 1 and the fact that the trace is invariant to unitary transforms. Thus,

$$V(\hat{Q}_{m,\gamma,t}, n) \leq \frac{\sigma^2}{n} \left(\frac{2t-1}{t-1}\right)^2 \text{Tr}\left(Z(Z + n/(\gamma t)I)^{-1}\right)^2.$$

### The expected excess risk for Nyström KRLS

The Nyström KRLS estimator with linear kernel is a function of the form

$$\begin{aligned} \tilde{f}(x_i) &= k_i^\top C y, \quad \text{with } C = \begin{pmatrix} \tilde{C}_{m,\lambda} \\ 0_{(n-m) \times n} \end{pmatrix}, \\ \tilde{C}_{m,\lambda} &= R(A^\top A + \lambda n I)^\dagger A^\top, \end{aligned}$$

with  $k_i = (k(x_i, x_1), \dots, k(x_i, x_n))$  for any  $i \in \{1, \dots, n\}$ . Now, by applying Prop. 1 we have

$$\begin{aligned} \tilde{Q}_{m,\lambda} &= KC = K_{nm} \tilde{C}_{m,\lambda} \\ &= A(A^\top A + \lambda n I)^{-1} A = AA^\top (AA^\top + \lambda I)^{-1} \\ &= Z(Z + \lambda n I)^{-1} \end{aligned}$$

Thus we have

$$\begin{aligned} V(\tilde{Q}_{m,\lambda}) &= \frac{\sigma^2}{n} \text{Tr}(\tilde{Q}_{m,\lambda})^2 = \frac{\sigma^2}{n} \text{Tr}\left(Z(Z + \lambda n I)^{-1}\right)^2 \\ B(\tilde{Q}_{m,\lambda}) &= \frac{1}{n} \|P(I - Z(Z + \lambda n I)^{-1})\mu\|^2 \\ &= \lambda^2 n \|P(Z + \lambda n I)^{-1}\mu\|^2 \\ &= \lambda^2 n \|(Z + \lambda n I)^{-1} P\mu\|^2, \end{aligned}$$

where the last step is due to the same reasoning as in the bound for the bias of NYTRO. Finally, by applying twice Prop. 3 and calling  $c_t = \left(\frac{2t-1}{t-1}\right)^2$ , we have that

$$\begin{aligned} R(\hat{f}_{m,\gamma,t}) &= V(\hat{Q}_{m,\gamma,t}, n) + B(\hat{Q}_{m,\gamma,t}) \\ &\leq c_t V(\tilde{Q}_{m,\frac{1}{\gamma t}}, n) + B(\tilde{Q}_{m,\frac{1}{\gamma t}}) \\ &\leq c_t \left( V(\tilde{Q}_{m,\frac{1}{\gamma t}}, n) + B(\tilde{Q}_{m,\frac{1}{\gamma t}}) \right) \\ &= c_t R(\tilde{f}_{m,\frac{1}{\gamma t}}) \end{aligned}$$

for  $\|Z\| \leq n/\gamma$  and  $t \geq 2$ . Now the choice  $\gamma = 1/(\max_{1 \leq i \leq n} k(x_i, x_i))$  is valid, indeed

$$\begin{aligned} \gamma \|Z\|^2 &= \gamma \|K_{nm} R R^\top K_{nm}^\top\| = \gamma \|K_{nm} K_{nm}^\dagger K_{nm}^\top\| \\ &\leq \gamma \|K\| \leq \gamma n \max_{1 \leq i \leq n} (K)_{ii} = \gamma n \max_{1 \leq i \leq n} k(x_i, x_i), \end{aligned}$$

where  $\|K_{nm}K_{mm}^\dagger K_{nm}^\top\| \leq \|K\|$  can be found in Bach (2013); Alaoui and Mahoney (2014).  $\square$

*Proof of Corollary 1.* Theorem 5 combined with Theorem 1 of Bach (2013).  $\square$
